# Supplementary material for: The Potential Role of IL1RAP on Tumor Microenvironment-Related Inflammatory Factors in Stomach Adenocarcinoma
Source: PubMed Central journal article supplement — Technol Cancer Res Treat. 2021 Feb 19;20:1533033821995282. doi: 10.1177/1533033821995282 (PMC7897808; doi:10.1177/1533033821995282), 2021-02-19
Supplement: sj-pdf-1-tct-10.1177_1533033821995282.pdf [file sj-pdf-1-tct-10.1177_1533033821995282.pdf]

## Figure Legend

(A) Western blot assay of IL1RAP expression in Con, Sparstolotin (Spa.) and JSH-23 group in vivo, (B) Quantification assay for IL-1RAP in different groups. (C) Western blot assay of IL1RAP expression in Con, IL-1RAP-shRNA, Spa. and JSH-23 group in vivo, (D) Quantification assay for IL1-RAP in different groups. Protein levels were normalized to  $\beta$ -actin. (Con vs. others,  $*P < 0.05$ ,  $n = 6$  per group, all data was represented as Mean  $\pm$  Standard error).
